# Supplementary material
Source: PubMed Central journal article supplement (PMC2669362)
Supplement: 0900977106_0900977106SI.pdf [file 0900977106_0900977106SI.pdf]

# Supporting Information

Gautam et al. 10.1073/pnas.0900977106

## SI Materials and Methods

**Glucose and Insulin Tolerance Tests.** For glucose and insulin tolerance tests, mice that had been subjected to an overnight (10–12 hr) fast were given glucose, either orally (via oral gavage) or i.p. (2 mg/g body weight), or insulin (Humulin, 0.75 milliunits/g; Eli Lilly), respectively. Blood was collected by means of retro-orbital sinus puncture before (time 0) and at defined times after injection of glucose or insulin for the measurement of glucose (Glucometer Elite; Bayer). Serum insulin and concentrations were determined by ELISA (Crystal Chem).

**Body Temperature Measurements.** Body temperature measurements were taken between 1–3 p.m. by using a rectal thermometer (model TH-5; Braintree Scientific).

**Quantification of M<sub>3</sub> mAChR Expression Levels by Using an Immunoprecipitation Strategy.** To quantitate the expression of M<sub>3</sub> mAChR protein in mouse tissues, we used a combined radioligand binding/immunoprecipitation strategy [Yamada M, et al. (2001) Mice lacking the M<sub>3</sub> muscarinic acetylcholine receptor are hypophagic and lean. *Nature* 410:207–212]. Membranes were prepared from mouse brain and salivary glands (submandibular gland), as described previously [Gautam D, et al. (2000) A critical role for  $\beta$  cell M<sub>3</sub> muscarinic acetylcholine receptors in regulating insulin release and blood glucose homeostasis in vivo. *Cell Metab* 3:449–461], and then incubated for 1 hr at room temperature (22 °C) with a saturating concentration (2 nM) of the non-subtype-selective muscarinic antagonist, quinuclidinyl [<sup>3</sup>H]benzilate ([<sup>3</sup>H]QNB; specific activity 42 Ci/mmol; PerkinElmer). Subsequently, [<sup>3</sup>H]QNB-labeled M<sub>3</sub> receptors were immunoprecipitated by the use of an M<sub>3</sub> receptor-specific rabbit polyclonal antiserum, as described by Yamada et al. The amount of [<sup>3</sup>H]QNB-labeled M<sub>3</sub> receptors in the immunoprecipitates was determined by liquid scintigraphy.

**Histology.** Whole brains or pituitary glands were harvested from control and Br-M3-KO mice. Tissues were fixed in 10% neutral buffered formalin, processed into paraffin blocks, sectioned at 5  $\mu$ m, and stained with H&E according to standard protocols.

For immunohistochemical staining of pituitary somatotroph cells, 5- $\mu$ m-thick pituitary sections were deparaffinized and endogenous peroxidases were quenched with H<sub>2</sub>O<sub>2</sub> for 10 min. Sections were then incubated with a rabbit polyclonal anti-GH antibody (1:400 dilution; DAKO, catalog #A0570) at room temperature for 60 min, followed by incubation (at room temperature for 30 min) with the Envision anti-rabbit secondary antibody (DAKO). Binding of the secondary antibody was visualized by using DAB+ (DAKO) as a chromogen. Sections were counterstained with Meyer's hematoxylin for 2 min.

**In Situ mRNA Hybridization Studies.** Coronal sections (12  $\mu$ m thick) of mouse hypothalamus were cut in a cryostat and mounted on positively charged microscope slides. The slides were kept at –80 °C until used. Before hybridization, the slides were fixed in 4% buffered formaldehyde and processed as described in the protocols link of <http://intramural.nimh.nih.gov/lcmr/snge/>. Briefly, a digoxigenin-labeled M<sub>3</sub> mAChR-specific riboprobe (complementary to nucleotides 1504–1958; NM\_033269) was generated by using digoxigenin-tagged UTP and T7 polymerase. After hybridization, the probe was developed by using a digoxigenin antibody conjugated to horseradish peroxidase (HRP). Finally, a tyramide-Alexafluor-594 conjugate (Perkin-Elmer) was used to visualize cells expressing M<sub>3</sub> receptor mRNA. A GHRH-specific <sup>35</sup>S-labeled riboprobe (complementary to nucleotides 323–480; M31654) was generated by using <sup>35</sup>S-labeled  $\alpha$ -thio-UTP and T7 polymerase. After hybridization (together with the nonradioactive M<sub>3</sub> receptor probe) and visualization of the M<sub>3</sub> receptor signal, the slides were coated with emulsion (Kodak NTB2) and developed 5 days later to visualize the autoradiographic grains over labeled cells (cells expressing GHRH mRNA). The slides were evaluated by using a Leica DMI-6000 inverted fluorescent microscope.





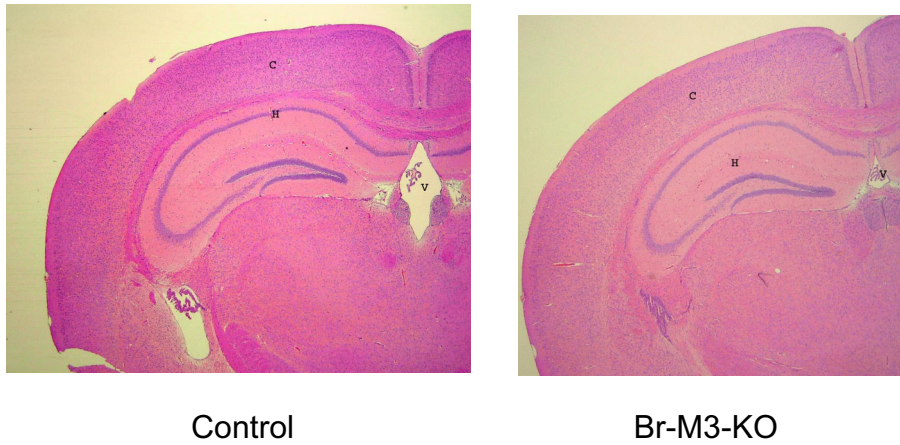

**Fig. S3.** Gross brain morphology of Br-M3-KO mice and control littermates. Representative frontal brain sections (H&E-stained) from a control mouse (*Left*) and a Br-M3-KO mouse (*Right*) are shown (16-week-old males). Altogether, sections from 4 control and 4 Br-M3-KO mice were examined. No obvious differences in brain morphology (besides the pituitary hypoplasia displayed by the Br-M3-KO mice) were observed.

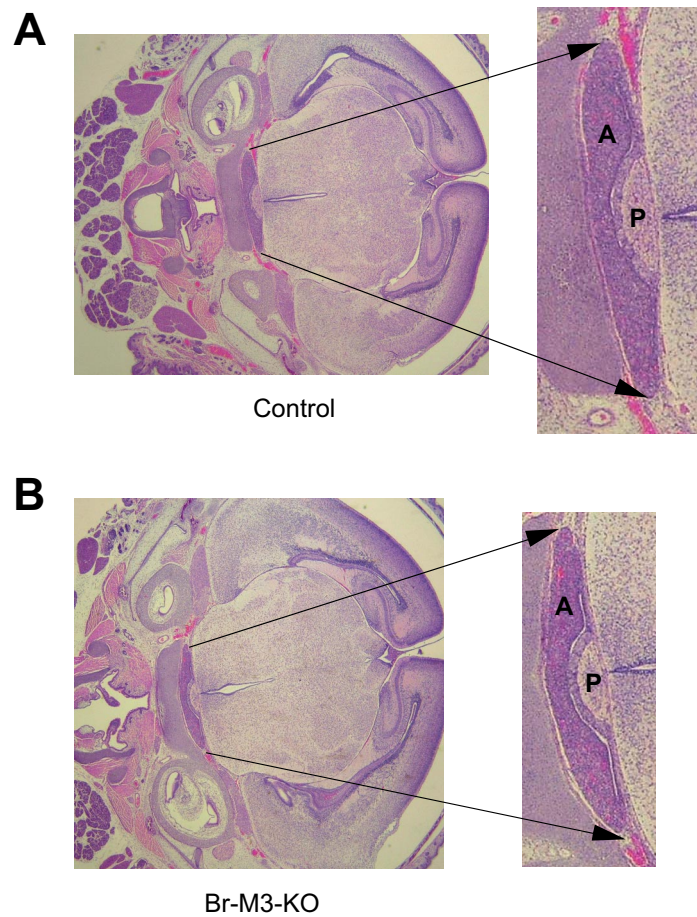

**Fig. S4.** Gross pituitary morphology of neonatal Br-M3-KO mice and control littermates. (*A* and *B*) Representative brain sections (H&E-stained) from a neonatal control mouse (postnatal day 1) (*A*) and a neonatal Br-M3-KO mouse (postnatal day 1) (*B*). Altogether, sections from 4 control and 4 Br-M3-KO mice were examined. No obvious differences in pituitary size and gross morphology were observed. A, anterior pituitary; P, posterior pituitary.





**Table S1. Fed and fasting blood glucose and serum insulin levels of Br-M3-KO mice and control littermates**

| Measurement          | Control    | Br-M3-KO   |
|----------------------|------------|------------|
| Blood glucose, mg/dL |            |            |
| Fed                  | 138 ± 6    | 135 ± 7    |
| Fasted               | 87 ± 5     | 94 ± 7     |
| Serum insulin, pg/mL |            |            |
| Fed                  | 1,029 ± 69 | 1,007 ± 37 |
| Fasted               | 403 ± 76   | 436 ± 55   |

All data were obtained with 14- to 16-week-old male mice (littermates). Data represent means ± SEM ( $n > 6$  per group).
